# Supplementary material for: Emodin, a rising star in the treatment of glycolipid metabolism disorders: a preclinical systematic review and meta-analysis
Source: PeerJ journal article supplement (doi:10.7717/peerj.19221), 2025-05-15
Supplement: Chinese_Articles.zip [file Chinese_Articles.zip]

剧烈运动后肌肉中过多乳酸的清除代谢,从而达到延缓疲劳或加速疲劳的消除的作用。

糖是肌肉组织的重要能量来源,体内的糖储备包括肌糖原、肝糖原和血糖三类。有研究表明,运动导致的体力衰竭总是和肌糖原的耗竭同时发生的,随着肌糖原消耗的不断增加,机体为维持血糖水平,将动用肝糖原而导致肝糖原减少<sup>[6]</sup>。因此,肝糖原和肌糖原含量是反映疲劳程度的敏感指标。实验结果显示,荔枝多糖能够维持运动后小鼠的肝糖原和肌糖原含量,从而为机体提供较好的能量储备。另外,糖原贮备的提高有利于机体耐力速度的提高,并减少蛋白质和含氮化合物的分解代谢,降低血BUN的形成。血BUN是蛋白质的代谢产物,一般运动时间不超过30 min时,蛋白质较少参与供能,BUN变化不明显。当机体长时间运动不能通过糖、脂肪分解代谢获得足够的能量时,蛋白质和氨基酸分解代谢才加强,BUN会明显增加,且BUN含量随运动负荷的增加而增加,身体对负荷的适应性越差,则产生的BUN越多<sup>[7]</sup>。由此可见,BUN与机体运动适应能力、疲劳程度以及负荷量的大小密切相关,因此可用来作为评定疲劳的指标。荔枝多糖能使游泳运动后休息60 min时小鼠的血BUN显著低于模型组,表明荔枝多糖能使小鼠耐力增加,对负荷的适应性

增强,延缓疲劳的产生。

综上所述,荔枝多糖能够提高小鼠的运动能力,增加肝糖原储备以及减少运动后尿素氮和乳酸的蓄积,从而具有良好的抗疲劳作用,有关其具体的抗疲劳机制有待进一步研究。

#### 参 考 文 献

- [1] 陈奇. 中药药理研究方法学[M]. 北京: 人民卫生出版社, 1996. 780-781.
- [2] 郭敏, 陈靠山. 牛蒡低聚果糖对小鼠抗疲劳作用的研究[J]. 天然产物研究与开发, 2007, 19(4): 642-644.
- [3] 昌友权, 郑鸿雁, 曲红光, 等. 柳黄酮抗疲劳作用的实验研究[J]. 食品科学, 2006, 27(8): 251-253.
- [4] 赵敬国. 肌肉疲劳的细胞学机制及应对措施[J]. 山东体育科技, 2001, 23(1): 26-29.
- [5] Xu GG, Luo QM. A study on the relationship between blood acid lactate in motion and hemoglobin saturation density—a new hemoglobinometry [J]. Wuhan Institute Physi Edu, 2001, 35(3): 40-42.
- [6] 王曦, 许晓燕, 郑林用, 等. 乳酸菌发酵黄芪的抗疲劳保健功能研究[J]. 时珍国医国药, 2011, 22(6): 1422-1424.
- [7] 汪海涛, 嵇扬, 徐永祥, 等. 枳椇子乙醇提取物抗疲劳作用的实验研究[J]. 解放军药学报, 2008, 24(2): 121-123.

## 大黄素改善肥胖型2型糖尿病小鼠 糖脂代谢的实验研究

周丽嫦, 徐艳燕, 陈伟标, 曾婉君, 王叶茗, 欧阳勇

(广州市中西医结合医院药剂科, 广东 广州 510800)

**摘要** 目的: 探索大黄素对肥胖型2型糖尿病小鼠糖、脂代谢的影响。方法: 雄性肥胖型2型糖尿病小鼠(diabetic mouse, db/db小鼠) 18只, 分大黄素高剂量(100 mg/kg)干预组, 大黄素低剂量(25 mg/kg)干预组及普通饮食对照组。喂养过程中每周监测体质量、血压、血脂、空腹血糖等, 共干预12 w, 于第12周行胰岛素耐量实验。实验结束后空腹取血测血脂、GLP-1、糖化血红蛋白水平。结果: 大黄素能防止db/db小鼠的体质量、空腹血糖的上升, 与对照组比较,  $P < 0.05$ ; 降低血脂水平及糖化血红蛋白水平, 增加GLP-1的释放, 但对血压无显著的影响。结论: 大黄素可显著改善肥胖型2型糖尿病小鼠的糖脂代谢。

**关键词** 大黄素; 2型糖尿病; db/db小鼠; 糖代谢; 脂代谢

中图分类号: R285.5 文献标识码: A 文章编号: 1001-4454(2012)09-1487-04

糖尿病是严重危害人民健康的重大疾病, 是心脑血管疾病、截肢的重要原因。目前全球已有超过

3亿的糖尿病患者, 我国糖尿病患者也接近1亿, 居世界的首位<sup>[1, 2]</sup>。目前的糖尿病防治方案并不能有

收稿日期: 2012-01-09

作者简介: 周丽嫦(1970-), 女, 主管药师, 主要从事中药药理研究。

效降低糖尿病的发生率,故积极寻求行之有效的治疗方案有重要的现实意义。我国是中医药大国,中医药的应用有几千年的历史,对于糖尿病的治疗积累了丰富的经验。近年来关于中草药活性成分防治糖尿病的研究方兴未艾,取得了一些突破性的进展。例如黄连素可促进胰岛素及 GLP-1 分泌改善糖代谢<sup>[3]</sup>,肉桂醛可以防治糖尿病肾脏损害等<sup>[4]</sup>。笔者及他人的前期研究表明,大黄素具有降低血脂,防止糖尿病大鼠肾脏纤维化,体外实验具有促进肠道降糖激素分泌的作用,但大黄素对 2 型糖尿病模型影响的系统整体的实验研究并未见相关的报道。为此,在本研究中笔者采用目前公认的肥胖型 2 型糖尿病小鼠(db/db 小鼠)探索大黄素对肥胖型 2 型糖尿病动物模型的糖、脂代谢的影响,现报道如下。

## 1 材料与仪器

1.1 实验动物 8 周龄雄性肥胖型 2 型糖尿病小鼠(db/db 小鼠) 18 只,8 周龄雄性 C57BL/KsJ 小鼠 6 只,均购自南京大学模式实验中心。

1.2 药物与试剂 大黄素;TG(甘油三酯)、TC(总胆固醇)、FFA(游离脂肪酸)ELISA 试剂盒购于深圳晶美公司;乌拉坦(国药集团化学试剂有限公司);用灭菌去离子水配制 10% 的乌拉坦溶液。

1.3 主要仪器 鼠尾血压测量仪(Powerlab2/25 澳大利亚);强生稳豪血糖仪(美国强生公司)。

## 2 方法

2.1 动物分组及给药 动物分为正常对照组、db/db 小鼠模型对照组及大黄素高、低剂量组,每组 6 只。大黄素高剂量组,在给予正常饮食的基础上每天以 100 mg/kg 的生理盐水大黄素溶液灌胃;大黄

表 1

大黄素对 db/db 小鼠体质量的影响( $\bar{x} \pm s$   $n=6$ )

| 组别      | 0 周                       | 2 周        | 4 周        | 6 周        | 8 周        | 10 周                    | 12 周                     |
|---------|---------------------------|------------|------------|------------|------------|-------------------------|--------------------------|
| 正常对照组   | 18.7 ± 1.1                | 19.3 ± 1.0 | 20.4 ± 1.2 | 21.3 ± 1.1 | 22.4 ± 1.2 | 24.4 ± 1.3              | 26.7 ± 1.4               |
| 模型组     | 33.8 ± 2.2 <sup>###</sup> | 35.1 ± 2.8 | 38.6 ± 2.6 | 40.5 ± 3.3 | 42.8 ± 3.3 | 45.7 ± 2.9              | 50.8 ± 4.2               |
| 大黄素高剂量组 | 33.3 ± 2.1 <sup>###</sup> | 32.8 ± 2.9 | 35.3 ± 3.0 | 37.3 ± 2.7 | 39.3 ± 3.2 | 41.3 ± 2.5 <sup>*</sup> | 42.8 ± 2.9 <sup>**</sup> |
| 大黄素低剂量组 | 33.7 ± 2.3 <sup>###</sup> | 34.6 ± 2.7 | 37.2 ± 2.9 | 38.8 ± 3.0 | 41.1 ± 3.1 | 43.4 ± 3.1              | 46.5 ± 3.8               |

注:与正常对照组比较,<sup>###</sup> $P < 0.01$ ;与模型组比较,<sup>\*</sup> $P < 0.05$ ,<sup>\*\*</sup> $P < 0.01$

3.2 大黄素对 db/db 小鼠空腹血糖的影响 与 C57BL/KsJ 小鼠比较,db/db 小鼠出生后 6 w 即可出现明显的肥胖和空腹血糖增加( $P < 0.01$ );干预前,各组 db/db 小鼠的空腹血糖无显著性差异( $P > 0.05$ );大黄素的预防性干预可显著抑制 db/db 小鼠空腹血糖的上升,在干预 8 w 后,大黄素高剂量组小鼠与 db/db 对照组小鼠差异显著( $P < 0.05$ )。见

素低剂量组在给予普通饲料喂养的基础上,每天给予 25 mg/kg 的生理盐水大黄素溶液灌胃;正常对照组的 C57BL/KsJ 小鼠给予普通饲料喂养,给予前两组等体积的生理盐水灌胃,1 次/d;db/db 对照组同样给予普通饲料喂养,每天给予等体积的生理盐水灌胃;所有小鼠自由饮水进食。自然昼夜采光,室温 22 ~ 24 °C,每日早晚喂食、换水,观察时间为 12 w。

2.2 观察指标及检测方法 应用无创方法,通过鼠尾血压测量仪(Powerlab2/25 澳大利亚)测定小鼠清醒、安静状态下鼠尾收缩压,每 2 周测定 1 次;以便携式血糖计每 2 周进行一次空腹血糖检测;干预结束后,小鼠以 10% 乌拉坦麻醉后于颈动脉取血,离心后取血浆于 -20 °C 下保存备用;TG、TC、FFA 等以 ELISA 法进行检测,方法按说明书进行。

2.3 统计学处理 实验数据以  $\bar{x} \pm s$  表示,用 Students' $t$  检验比较组间差异的显著性;多组间比较采用 One-way ANOVA 检验,以  $P < 0.05$  为有统计学差异。

## 3 结果

3.1 大黄素对 db/db 小鼠体质量的影响 db/db 小鼠体质量显著高于正常对照组的 C57BL/KsJ 小鼠( $P < 0.01$ );干预前,各组 db/db 小鼠的体质量无显著性差异( $P > 0.05$ );高剂量的大黄素可显著抑制 db/db 小鼠体质量的增长速度,至第 10 周及第 12 周,高剂量组与模型组差异显著( $P < 0.05$ , $P < 0.01$ );而大黄素低剂量组虽亦有抑制 db/db 小鼠体质量上升的趋势,但差异不显著( $P > 0.05$ )。见表 1。

表 2

| 组别      | 0 周                       | 2 周        | 4 周        | 6 周        | 8 周        | 10 周                    | 12 周                     |
|---------|---------------------------|------------|------------|------------|------------|-------------------------|--------------------------|
| 正常对照组   | 18.7 ± 1.1                | 19.3 ± 1.0 | 20.4 ± 1.2 | 21.3 ± 1.1 | 22.4 ± 1.2 | 24.4 ± 1.3              | 26.7 ± 1.4               |
| 模型组     | 33.8 ± 2.2 <sup>###</sup> | 35.1 ± 2.8 | 38.6 ± 2.6 | 40.5 ± 3.3 | 42.8 ± 3.3 | 45.7 ± 2.9              | 50.8 ± 4.2               |
| 大黄素高剂量组 | 33.3 ± 2.1 <sup>###</sup> | 32.8 ± 2.9 | 35.3 ± 3.0 | 37.3 ± 2.7 | 39.3 ± 3.2 | 41.3 ± 2.5 <sup>*</sup> | 42.8 ± 2.9 <sup>**</sup> |
| 大黄素低剂量组 | 33.7 ± 2.3 <sup>###</sup> | 34.6 ± 2.7 | 37.2 ± 2.9 | 38.8 ± 3.0 | 41.1 ± 3.1 | 43.4 ± 3.1              | 46.5 ± 3.8               |

注:与正常对照组比较,<sup>###</sup> $P < 0.01$ ;与模型组比较,<sup>\*</sup> $P < 0.05$ ,<sup>\*\*</sup> $P < 0.01$

表 2。

3.3 大黄素对 db/db 小鼠血压的影响 肥胖与血压高度相关,笔者在本研究中同时探讨了大黄素对肥胖小鼠血压的影响。但以上 2 种剂量的大黄素对 db/db 小鼠的血压无显著性影响。此外,db/db 小鼠的血压与正常对照小鼠的血压也无显著性差异( $P > 0.05$ )。见表 3。

表 2

大黄素对 db/db 小鼠空腹血糖的影响 (mmol/L  $\bar{x} \pm s$   $n=6$ )

| 组别      | 0 周                     | 2 周        | 4 周        | 6 周        | 8 周                     | 10 周                    | 12 周                    |
|---------|-------------------------|------------|------------|------------|-------------------------|-------------------------|-------------------------|
| 正常对照组   | 4.5 ± 0.6               | 5.1 ± 0.5  | 5.3 ± 0.9  | 5.5 ± 0.6  | 5.9 ± 0.7               | 5.6 ± 0.4               | 5.9 ± 0.9               |
| 模型组     | 9.0 ± 1.8 <sup>##</sup> | 10.4 ± 1.3 | 12.3 ± 1.1 | 11.4 ± 2.1 | 12.9 ± 2.1              | 13.4 ± 2.1              | 16.6 ± 3.1              |
| 大黄素高剂量组 | 9.7 ± 3.6 <sup>##</sup> | 10.8 ± 1.0 | 12.8 ± 1.6 | 11.0 ± 1.7 | 10.4 ± 1.5 <sup>*</sup> | 11.1 ± 1.2 <sup>*</sup> | 12.7 ± 1.8 <sup>*</sup> |
| 大黄素低剂量组 | 9.5 ± 2.3 <sup>##</sup> | 10.7 ± 1.7 | 11.9 ± 2.1 | 12.1 ± 2.3 | 12.0 ± 1.9              | 12.8 ± 2.7              | 14.6 ± 2.9              |

注:与正常对照组比较,<sup>##</sup> $P < 0.01$ ;与模型组比较,<sup>\*</sup> $P < 0.05$

表 3

大黄素对 db/db 小鼠血压的影响 (mmHg  $\bar{x} \pm s$   $n=6$ )

| 组别      | 0 周     | 2 周     | 4 周     | 6 周      | 8 周      | 10 周     | 12 周     |
|---------|---------|---------|---------|----------|----------|----------|----------|
| 正常对照组   | 113 ± 8 | 110 ± 6 | 116 ± 7 | 119 ± 10 | 122 ± 9  | 125 ± 13 | 123 ± 10 |
| 模型组     | 116 ± 6 | 115 ± 5 | 118 ± 8 | 123 ± 11 | 117 ± 10 | 119 ± 11 | 118 ± 8  |
| 大黄素高剂量组 | 114 ± 9 | 117 ± 8 | 119 ± 9 | 120 ± 8  | 124 ± 12 | 123 ± 10 | 119 ± 9  |
| 大黄素低剂量组 | 112 ± 7 | 114 ± 7 | 115 ± 6 | 121 ± 9  | 121 ± 11 | 116 ± 9  | 122 ± 11 |

3.4 大黄素对 db/db 小鼠血脂水平的影响 与正常对照小鼠比较,db/db 小鼠血浆中的 TG、TC、FFA 水平显著升高 ( $P < 0.05$ )。高剂量大黄素的预防性干预可有效控制 db/db 小鼠血浆 TG、TC、水平的升高 ( $P < 0.05$ )。低剂量大黄素虽有控制血脂上升的趋势,但在干预 12 周内作用并不显著 ( $P > 0.05$ )。见表 4。

表 4 大黄素对 db/db 小鼠血脂水平的影响 ( $\bar{x} \pm s$   $n=6$ )

| 组别      | TG/<br>(mmol/L)           | TC/<br>(mmol/L)          | FFA/<br>(mmol/L) |
|---------|---------------------------|--------------------------|------------------|
| 正常对照组   | 1.05 ± 0.14               | 3.37 ± 0.58              | 1.12 ± 0.13      |
| 模型组     | 1.51 ± 0.17 <sup>##</sup> | 4.57 ± 0.67              | 1.23 ± 0.16      |
| 大黄素高剂量组 | 1.16 ± 0.11 <sup>**</sup> | 3.89 ± 0.31 <sup>*</sup> | 1.14 ± 0.12      |
| 大黄素低剂量组 | 1.32 ± 0.14               | 4.32 ± 0.54              | 1.18 ± 0.14      |

注:与正常对照组比较,<sup>##</sup> $P < 0.01$ ;与模型组比较,<sup>\*</sup> $P < 0.05$ ,<sup>\*\*</sup> $P < 0.01$

3.5 大黄素对 db/db 小鼠胰岛素敏感性的影响 db/db 小鼠存在明显的胰岛素抵抗,与正常对照组比较差异显著 ( $P < 0.01$ );与 db/db 对照组比较,大黄素可有效改善 db/db 小鼠胰岛素的敏感性 ( $P < 0.05$ )。见图 1。

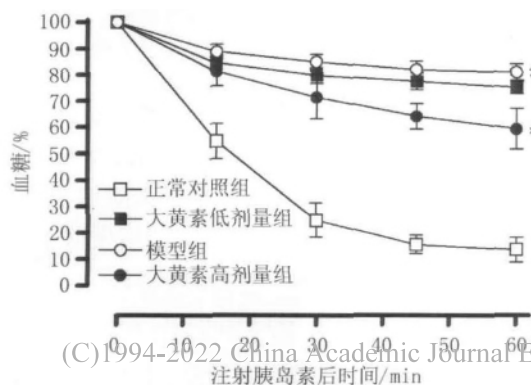

图 1 大黄素对 db/db 小鼠胰岛素敏感性的影响

注:与正常对照组比较,<sup>##</sup> $P < 0.01$ ;与模型组比较,<sup>\*</sup> $P < 0.05$

## 4 讨论

目前的研究证实大黄素具有较好的改善糖代谢及脂质代谢的作用,但未见有关于大黄素对肥胖性 2 型糖尿病小鼠模型的影响的系统研究,机制也不清。笔者的实验研究表明,大黄素的干预可显著防止肥胖型 2 型糖尿病小鼠的体质量、空腹血糖、血脂水平的升高,促进 GLP-1 的分泌,但对糖尿病小鼠的血压并无显著的影响。

db/db 小鼠由 C57BL/KsJ 近亲交配株常染色体隐性遗传衍化而来,由于 leptin 基因受体缺陷而引起体内脂质代谢紊乱,与人 2 型糖尿病发生相似,是目前公认的用于研究 2 型糖尿病的小鼠模型。动物在一个月时开始贪食及发胖,继而出现显著的胰岛素抵抗,产生高血糖、高血胰岛素,胰高血糖素也升高,而 GLP-1 分泌显著减少。该类型小鼠一般在 10 个月内死亡。大黄素在大黄、虎杖等中药中含量丰富,目前研究证实具有良好的抗微生物、抗炎、抗氧化、清除自由基等活性,具有保肝、抗肿瘤、抗肾脏纤维化、抗缺血-再灌注损伤等作用<sup>(5)</sup>。笔者的前期研究发现,大黄素体外可促进 STC-1 细胞分泌 GLP-1,体内急性实验表明可促进 GLP-1 的分泌。GLP-1 是肠道,尤其是远端回肠分泌的一种降糖激素,具有抑制胰岛  $\beta$  细胞凋亡,恢复胰岛  $\beta$  细胞的生理功能,促进胰岛素分泌,降低血糖作用,还能扩张血管,降低血压,抑制心肌重构。但体内 GLP-1 很快被 DPP4 降解,半衰期很短,只有 5 min 左右,目前已利用基因重组技术合成了 GLP-1 类似物,用于治疗糖尿病,尤其是 2 型糖尿病患者<sup>(6)</sup>。GLP-1 还具有改善外周胰岛素抵抗,减肥和无低血糖反应的优点<sup>(7)</sup>,故针对 GLP-1 这个特点近年来研究者们着重研究如何促进内源性的 GLP-1 分泌,从而改善 2 型糖尿病患者的糖脂代谢。目前已取得一些令人惊喜的研

究成果,例如, Daoudi 等<sup>[8]</sup>发现 PPAR $\beta$  激动剂可促进内源性 GLP-1 分泌; YU 等<sup>[3]</sup>证实黄连素可通过 PKC 信号通路促进内源性 GLP-1 的分泌; Thomas 等<sup>[9]</sup>发现一种 G 蛋白偶联受体 TGR5 可促进 GLP-1 分泌从而控制葡萄糖稳态。

本试验结果表明大黄素可改善肥胖性 2 型糖尿病小鼠的胰岛素抵抗,降低体质量,防止空腹血糖的升高及降低血脂水平,这可能与大黄素促进内源性 GLP-1 的分泌增加有关。大黄素对于肥胖性 2 型糖尿病有较好的疗效,值得进一步开发。

### 参 考 文 献

- [1] Rathmann W, Giani G. Global prevalence of diabetes: estimates for the year 2000 and projections for 2030 [J]. *Diabetes Care* 2004, 27: 2568-2569; author reply 2569.
- [2] Shaw JE, Sicree RA, Zimmet PZ. Global estimates of the prevalence of diabetes for 2010 and 2030 [J]. *Diabetes Res Clin Pract* 2010, 87(1): 4-14.
- [3] Yu Y, Liu L, Wang X, et al. Modulation of glucagon-like peptide-1 release by berberine: *in vivo* and *in vitro* studies [J]. *Biochem Pharmacol* 2010, 79: 1000-1006.
- [4] Subash Babu P, Prabuseenivasan S, Ignacimuthu S. Cinna- maldehyde-a potential antidiabetic agent [J]. *Phytomedicine* 2007, 14: 15-22.
- [5] LIU Han, GAO Yun. Research progress in molecular mechanism of the pharmacological actions of emodin [J]. *Chinese Pharmacological Bulletin* 2009, 25(12): 1552-1555.
- [6] Buteau J. GLP-1 receptor signaling: effects on pancreatic beta-cell proliferation and survival [J]. *Diabetes Metab*, 2008, 34 Suppl 2: S73-77.
- [7] Gupta R, Walunj SS, Tokala RK, et al. Emerging drug candidates of dipeptidyl peptidase IV (DPP IV) inhibitor class for the treatment of Type 2 Diabetes [J]. *Curr Drug Targets* 2009, 10: 71-87.
- [8] Z Daoudi M, Hennuyer N, Borland MG, et al. PPAR $\beta$ /delta activation induces enteroendocrine L cell GLP-1 production [J]. *Gastroenterology* 2011, 140: 1564-1574.
- [9] Thomas C, Gioiello A, Noriega L, et al. TGR5-mediated bile acid sensing controls glucose homeostasis [J]. *Cell Metab* 2009, 10: 167-177.

## 左旋虾青素对四氯化碳致小鼠急性肝损伤保护作用的研究

罗文基<sup>1</sup>, 黄丽娟<sup>1</sup>, 陈逸生<sup>1</sup>, 张坤水<sup>2\*</sup>

(1. 中山大学附属第五医院, 广东 珠海 519000; 2. 中山大学孙逸仙纪念医院药学部, 广东 广州 510120)

**摘要** 目的: 探讨左旋虾青素对四氯化碳致小鼠急性肝损伤的保护作用。方法: 通过皮下注射四氯化碳 (CCl<sub>4</sub>) 诱导小鼠急性肝损伤, 检测小鼠血清中丙氨酸氨基转移酶 (ALT)、天门冬氨酸氨基转移酶 (AST) 的含量、肝脏中超氧化物歧化酶 (SOD) 的活性以及丙二醛 (MDA) 的含量, 考察左旋虾青素的保肝作用。结果: 左旋虾青素能显著降低小鼠血清中 ALT、AST 的活性与肝脏中 MDA 含量, 提高小鼠肝脏的 SOD 活性。结论: 左旋虾青素对 CCl<sub>4</sub> 所致肝脏毒性具有一定保护作用。

**关键词** 虾青素; 四氯化碳; 氨基转移酶; 超氧化物歧化酶; 丙二醛

中图分类号: R285.5 文献标识码: A 文章编号: 1001-4454(2012)09-1490-03

左旋虾青素 (Astaxanthin) 是一种红色的胡萝卜素, 主要来自雨生红球藻, 分子式为 C<sub>40</sub>H<sub>52</sub>O<sub>4</sub>, 经证实有极强的抗氧化作用, 也具较强的清除自由基能力。据报道<sup>[1]</sup>, 左旋虾青素的抗氧化活性是维生素 E 的 550 倍, 是 B<sub>2</sub> 胡萝卜素、玉米黄素、叶黄素和角黄素等类胡萝卜素的 10 倍, 被誉为“超级维生素 E”、“超级抗氧化剂”。虾青素具有 3 种异构形态

(左旋、右旋、消旋), 近年来研究证实左旋虾青素有最强的抗氧化作用, 能够清除自由基, 具有与 SOD 相似的作用。本文考察了左旋虾青素对四氯化碳致小鼠急性肝损伤的保护作用, 现将结果报道于下。

### 1 实验材料

1.1 实验动物 SPF 级昆明小鼠, 体质量 20 ~ 25 g, 雌雄各半, 购自广东省医学实验中心, 许可证号:

收稿日期: 2012-04-10

作者简介: 罗文基 (1973-), 男, 主管药师, 主要从事医院药学研究; Tel: 0756-2528278, E-mail: luowenji2005@21cn.com。

\* 通讯作者: 张坤水, Tel 020-84113095, E-mail: pnhunter@sina.com。
