# Supplementary material for: Emodin, a rising star in the treatment of glycolipid metabolism disorders: a preclinical systematic review and meta-analysis
Source: PeerJ. 2025 May 15;13:e19221. doi: 10.7717/peerj.19221 (PMC12085882; doi:10.7717/peerj.19221)
Supplement: Supplemental Information 18 [file peerj-13-19221-s018.xlsx]

## Sheet: body weight
author	year	exp_mean	exp_sd	exp_n	con_mean	con_sd	con_n	dosage	duration	species	_SS	_ES	_seES	_LCI	_UCI	_WT
Jianfeng Xue	2010	21.8497	4.0462	15	19.6532	3.3526	10	1	1	2	25	2.1965	1.48844	-0.720781	5.11378	28.1537
Lichang Zhou	2012	42.8	2.9	6	50.8	4.2	6	1	2	2	12	-8	2.08367	-12.0839	-3.91609	27.2641
Dan Xiao	2018	244.73	10.53	10	302.63	21.05	10	2	1	1	20	-57.9	7.44301	-72.488	-43.312	15.5018
Yuejing Wang	2012	3.9	0.22	8	11.1	1.03	8	2	1	2	16	-7.2	0.372374	-7.92984	-6.47016	29.0805

## Sheet: FPG
author	year	exp_mean	exp_sd	exp_n	con_mean	con_sd	con_n	dosage	duration	species
Xiaoyan Zhao	2009	15.8	1.6	8	30.1	1.2	8	2	1	1
Jianfeng Xue	2010	10.04	3.2	15	18.21	1.5	10	1	1	2
Yuejing Wang	2012	10.86	1.71	8	15.79	2.29	8	2	1	2
Lichang Zhou	2012	12.7	1.8	6	16.6	3.1	6	1	2	2
Bing Song	2012	5.65	0.3	10	8.6	0.33	10	2	2	2
Qing Xiang	2014	8.79	1.43	10	13.55	1	10	2	1	1
Sameer Abu Eid	2017	7.24	0.35	12	9.46	0.39	12	1	2	2
Song Bing	2018	5.56	0.38	8	8.8	0.26	8	2	2	2
Fei Gao	2019	19.03	6.42	10	20.76	4.31	10	2	2	1
Dan Xiao	2018	20.65	0.52	10	30.06	1.05	10	2	1	1
Aditya Arvindekar	2015	12.43	1.41	3	12.57	2.26	3	1	1	1
Yuping Song	2017	12.94	2.35	10	27.52	2.82	10	2	2	2

## Sheet: 2hPG
author	year	exp_mean	exp_sd	exp_n	con_mean	con_sd	con_n	dosage	duration	species
Jianfeng Xue	2010	11.47	3.31	15	20.14	2.8	10	1	1	2
Yuejing Wang	2012	12.99	1.64	8	18.91	2.3	8	2	1	2
Aditya Arvindekar	2015	11.86	0.85	3	22.74	0.99	3	1	1	1
Sameer Abu Eid	2017	11.22	0.63	12	13.22	0.94	12	1	2	2
Fei Gao	2019	26.73	5.69	10	29.97	4.67	10	2	2	1
Yuping Song	2017	15.67	2.18	10	30.39	3.78	10	2	2	2

## Sheet: TC
author	year	exp_mean	exp_sd	exp_n	con_mean	con_sd	con_n	dosage	duration	species	_SS	_ES	_seES	_LCI	_UCI	_WT
Xiaoyan Zhao	2009	3.68	0.01	8	6.17	0.38	8	2	1	1	16	-9.26361	1.82066	-12.832	-5.69518	12.7762
Jianfeng Xue	2010	2	0.03	15	2.11	0.05	10	1	1	2	25	-2.81581	0.582264	-3.95702	-1.67459	17.2796
Lichang Zhou	2012	3.89	0.31	6	4.57	0.67	6	2	2	2	12	-1.30264	0.646666	-2.57009	-0.035201	17.1191
Bing Song	2012	3.04	0.21	8	5.63	0.57	8	2	2	2	16	-6.02978	1.24439	-8.46874	-3.59082	15.1142
Yuejing Wang	2012	2.82	0.21	8	3.34	0.26	8	2	1	2	16	-2.20035	0.650317	-3.47495	-0.925752	17.1096
Song Bing	2018	2.93	0.07	8	5.77	0.21	8	2	2	2	16	-18.1441	3.46517	-24.9357	-11.3525	7.25379
Dan Xiao	2018	1.71	0.13	10	3.35	0.2	10	2	1	1	20	-9.72305	1.68109	-13.0179	-6.42819	13.3475

## Sheet: TG
author	year	exp_mean	exp_sd	exp_n	con_mean	con_sd	con_n	dosage	duration	species
Xiaoyan Zhao	2009	0.9	0.02	8	1.79	0.12	8	2	1	1
Jianfeng Xue	2010	0.41	0.02	15	0.56	0.04	10	1	1	2
Yuejing Wang	2012	4.15	0.21	8	5.54	0.41	8	2	2	2
Lichang Zhou	2012	1.16	0.11	6	1.51	0.17	6	2	2	2
Bing Song	2012	1.06	0.19	8	2.8	0.57	8	2	1	2
Song Bing	2018	0.96	0.06	8	2.74	0.63	8	2	2	2
Dan Xiao	2018	18.27	0.98	10	38.21	3.9	10	2	1	1

## Sheet: INS
author	year	exp_mean	exp_sd	exp_n	con_mean	con_sd	con_n	species	duration	dosage
Bing Song	2012	30.18	2.02	8	54.13	6.23	8	2	2	2
Qing Xiang	2014	20.89	2.26	8	45.21	4.27	8	1	1	2
Sameer Abu Eid	2017	23.32	3.66	12	29.7	6.42	12	2	2	1
Song Bing	2018	22.1	2.45	8	54.22	6.24	8	2	2	2
Yuping Song	2017	22.64	6.62	10	59.4	11.83	10	2	2	2
